# Supplementary material for: Boosting the efficiency of PTB7-Th:PC71BM polymer solar cells via a low-cost halogen-free supramolecular solid additive
Source: Royal Society of Chemistry journal article supplement (doi:10.1039/d0tc04096g), 2020-01-01
Supplement: d0tc04096g1.pdf [file d0tc04096g1.pdf]

***Supporting Information***

**Boosted the efficiency of PTB7-Th:PC<sub>71</sub>BM polymer solar cells  
via a low-cost halogen-free supramolecular solid additive**

Qiang Zhang,<sup>a</sup> Chengjia Bao,<sup>a</sup> Suqian Cui,<sup>a</sup> Ping Zhong,<sup>b\*</sup> Kai Zhang,<sup>a</sup>  
Weiguo Zhu,<sup>a\*</sup> Yu Liu<sup>a\*</sup>

*<sup>a</sup>School of Materials Science and Engineering, Jiangsu Engineering Laboratory of  
Light-Electricity-Heat Energy-Converting Materials and Applications, Jiangsu  
Collaborative Innovation Center of Photovoltaic Science and Engineering, National  
Experimental Demonstration Center for Materials Science and Engineering,  
Changzhou University, Changzhou 213164, China*

*<sup>b</sup>School of Environmental and Chemical Engineering, Zhao Qing University,  
Zhao Qing 526061, China*

Email addresses:

(Y. L) [liuyu03b@126.com](mailto:liuyu03b@126.com)

(W.Z) [zhuwg18@126.com](mailto:zhuwg18@126.com)

(P.Z) [paint12@vip.tom.com](mailto:paint12@vip.tom.com)

## Contents

Figure S1. Molecule structures of PBTOR-FBTA and ITIC

Figure S2. Schematic energy diagram of the materials used in the PSCs

Figure S3.  $J$ - $V$  curves of PSCs without, with 2 vol% DIO as well as 2 wt% ROPD, respectively.

Table S1. Photovoltaic parameters of PSCs based on PBTOR-FBTA:ITIC without, with 2 vol% DIO, and with 2 wt% ROPD additives, respectively.

**Figure S1**

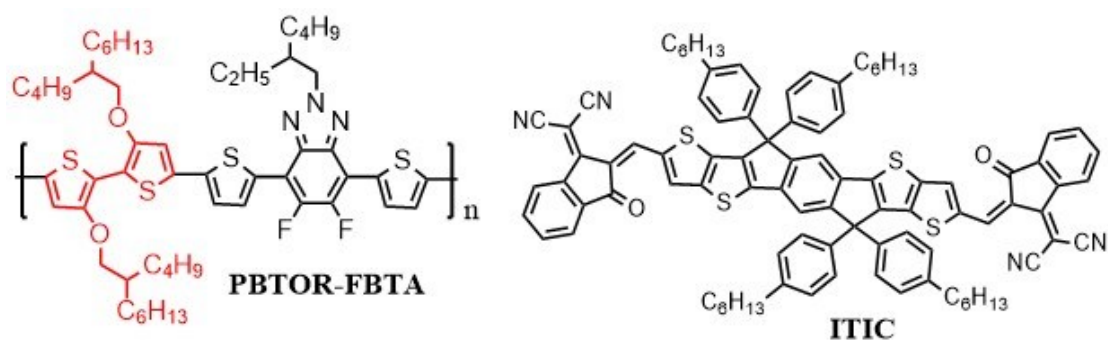

**Figure S2**

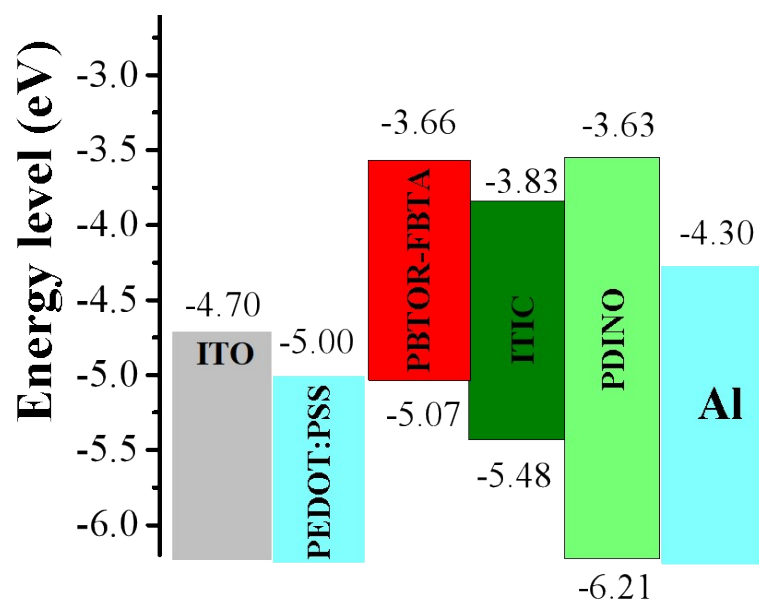

**Figure S3**

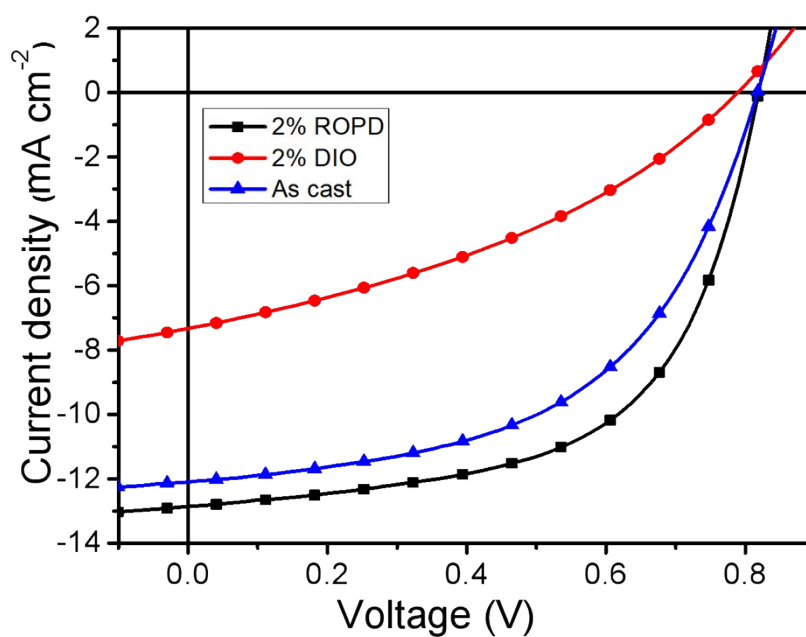

**Table S1**

| Additive | $V_{oc}$ (V) | $J_{sc}$ (mA/cm <sup>2</sup> ) | FF (%) | PCE (%) | Speed (rpm) |
|----------|--------------|--------------------------------|--------|---------|-------------|
| As cast  | 0.82         | 12.06                          | 52.87  | 5.21    | 2500        |
| 2%DIO    | 0.79         | 7.32                           | 36.54  | 2.10    | 2500        |
| 2%ROPD   | 0.82         | 12.84                          | 58.68  | 6.17    | 2500        |
